## High Prevalence of Reduced Fecundity in Men with Congenital Adrenal Hyperplasia

Nicole Reisch, Linda Flade, Michael Scherr, Marietta Rottenkolber, Francesco Pedrosa Gil, Martin Bidlingmaier, Hans Wolff, Hans-Peter Schwarz, Marcus Quinkler, Felix Beuschlein, and Martin Reincke

Endocrinology and Metabolism (N.R., L.F., M.B., F.B., M.Re.), Psychosomatic Ambulance and Outpatient Clinic (F.P.G.), Medizinische Klinik-Innenstadt, Department of Radiology (M.S.), Outpatient Clinic of Andrology, Department of Dermatology (H.W.), and Department of Endocrinology, von Haunersches Kinderspital (H.-P.S.), University Hospital München, D-80336 München, Germany; Institute of Medical Information Technology, Biometry and Epidemiology (M.Ro.), Ludwig-Maximilians-Universität, München D-81377, Germany; and Clinical Endocrinology (M.Q.), Charité Campus Mitte, Charité University Medicine Berlin, Berlin 13353, Germany

**Context:** Testicular adrenal rest tumors (TARTs) are regarded to contribute to the high prevalence of subfertility in males with congenital adrenal hyperplasia (CAH).

**Objectives:** Our objectives were to evaluate reduced fecundity and its possible causes in well-controlled adult males with CAH, and to investigate diagnostic tools for improved treatment monitoring with respect to fertility outcomes.

**Design:** In a cross-sectional study at the Department of Endocrinology at the University Hospital München, Germany, 22 adult male CAH patients (15 salt wasting and seven simple virilizing, age 19–48 yr) were clinically assessed according to their hormonal control. We performed testicular ultrasound (22 of 22), magnetic resonance imaging (18 of 22), and a semen analysis (19 of 22) in the participants.

**Results:** All patients had a pathological semen analysis. TART prevalence was 10 of 22 (eight salt wasting, two simple virilizing). Poor therapy control was present in five patients, and all five had TARTs. Of the other 17 well-controlled patients with normal or suppressed adrenal androgens and 17-hydroxyprogesterone levels, five presented with TARTs. There was a significant correlation between sperm concentration and functional testicular volume ( $r = 0.70$ ;  $P = 0.002$ ), TART volume ( $r = -0.70$ ;  $P = 0.036$ ), as well as inhibin B levels ( $r = 0.75$ ;  $P < 0.0001$ ), respectively. In several men, hormonal control parameters suggested hypogonadism, with glucocorticoid overtreatment as a relevant factor for poor semen quality.

**Conclusions:** Poor semen parameters are common in male CAH patients. TARTs, most likely reflecting undertreatment, as well as inhibin B are important indicators of fecundity. On the other hand, long-term glucocorticoid overtreatment also seems to contribute to low semen quality. (*J Clin Endocrinol Metab* 94: 1665–1670, 2009)

Low childbirth rates and impaired fertility have been reported in congenital adrenal hyperplasia (CAH) patients of both sexes. High prevalence of testicular adrenal rest tumors (TARTs) in CAH males is thought to be associated with impaired fertility (1). Adrenals and gonads derive from a common adrenogonadal primordium during development (2). TARTs are thought to ini-

tiate from adrenocortical remnants that have descended with the testes. On a functional level, TARTs have been ACTH dependent (3) and expressed adrenal-specific steroidogenic enzymes, as well as ACTH and angiotensin II receptors (4, 5). High and prolonged ACTH levels in this situation may stimulate their growth, which can be reversed by suppressive glucocorticoid treatment (6).

ISSN Print 0021-972X ISSN Online 1945-7197  
Printed in U.S.A.

Copyright © 2009 by The Endocrine Society

doi: 10.1210/jc.2008-1414 Received July 3, 2008. Accepted February 20, 2009.

First Published Online March 3, 2009

Abbreviations: CAH, Congenital adrenal hyperplasia; cor/ax, coronary/axial; HPG, hypothalamus-pituitary gonadal; MRI, magnetic resonance imaging; 17-OHP, 17-hydroxyprogesterone; TART, testicular adrenal rest tumor; WHO, World Health Organization.

However, Stikkelbroeck *et al.* (1) reported a high prevalence of TARTs also in adequately or even overtreated patients with suppressed ACTH levels. Chronic suppression of gonadotrophin secretion due to adrenal androgen excess has been suggested as another mechanism for infertility in male CAH patients (1).

In this study we evaluated fecundity and Leydig cell function in a well-defined and well-controlled cohort of adult male CAH patients. We investigated the underlying causes of reduced fecundity with the goal of defining diagnostic tools for improving treatment monitoring with respect to fertility outcomes.

## Subjects and Methods

### Patient population

The subjects were adult male patients with genetically confirmed classical CAH due to 21-hydroxylase deficiency with regular hormonal follow-up at the outpatient clinic of the Department of Endocrinology of the University Hospital München. The local ethics committee approved the study protocol. All subjects gave written informed consent. For individual patient characteristics, see Table 1. Exclusion criteria were other diseases with impairment of gonadal capacity, and other general and psychiatric diseases.

### Study protocol

All patients were seen at the outpatient clinic by one experienced endocrinologist (F.B.). In each patient medical history, physical examination, blood drawing (between 0800 and 1000 h, 2 h after morning medication), 24-h urine collection, and testicular ultrasound were performed, and in 19 of 22 semen analysis and in 18 of 22 magnetic resonance imaging (MRI) of the testis were obtained.

Adequate hormonal control of CAH was defined if serum androgen levels were within the normal range and 17-hydroxyprogesterone (17-OHP) concentration in serum was 2.0–10 ng/ml (6–30 nmol/liter) 2 h after intake of morning medication and/or early morning salivary 17-OHP was between 500 and 4,000 pmol/liter (data not shown) and/or pregnanetriol in 24-h urine was less than 10,000  $\mu$ g/d (data not shown). Possible overtreatment was defined as suppressed androgen levels and normalized to decreased 17-OHP concentration in serum or saliva or pregnanetriol in 24-h urine.

### Testicular imaging

Grey-scale and color Doppler ultrasonography of the testis was obtained in longitudinal and transverse sections. MRI was performed in the Department of Radiology of the University Hospital München by dedicated testicular MRI using a 1.5T-Scanner (Magnetom Vision; Siemens, Erlangen, Germany). Thin-slice turbo spin echo series [3 mm T1w coronary/axial (cor/ax), T2w cor/ax, and two consecutive T1w cor/ax after administration of gadolinium contrast agent] were applied using a 14-cm loop flex coil placed on the surface of the elevated testicles with patients in prone position.

### Semen analysis

Seminal fluid was collected by the subjects (19 of 22) after 3–7 d self-reported ejaculatory abstinence. Semen analysis was performed at the Department of Andrology at the University Hospital of Dermatology in München, and included assessment of semen volume (measured by graduated tube), sperm concentration (Neubauer Chamber, depth 0.1 mm, volume 0.0025 mm<sup>3</sup>; Karl Hecht KG, Sondheim, Germany), total sperm count, motile and immotile spermatozoa according to World Health Organization (WHO) criteria of 1999 (7), and morphology evaluation [Tygerberg criteria (8)].

### Hormone assays in blood and saliva samples

Circulating concentrations of  $\Delta^4$ -androstenedione, testosterone, LH, FSH, ACTH, inhibin B, and 17-OHP were measured by commercially

**TABLE 1.** Clinical and genetic characteristics of the patient cohort

| Patient no. | Phenotype | Genotype    | Mutation group | Age (yr) | BMI (kg/m <sup>2</sup> ) | Height (cm) | GC dose equivalent/m <sup>2</sup> BSA (mg/m <sup>2</sup> ) | FC dose/m <sup>2</sup> BSA ( $\mu$ g/m <sup>2</sup> ) |
|-------------|-----------|-------------|----------------|----------|--------------------------|-------------|------------------------------------------------------------|-------------------------------------------------------|
| I/9         | SW        | Del/Conv    | Null           | 48       | 26.3                     | 163.0       | 13.89                                                      | 41.67                                                 |
| I/1         | SW        | Del/Del     | Null           | 35       | 34.5                     | 160.5       | 15.79                                                      | 52.63                                                 |
| I/17        | SW        | Del/Del     | Null           | 35       | 31.9                     | 178.0       | 11.93                                                      | 22.73                                                 |
| I/19        | SW        | Del/Del     | Null           | 33       | 32.0                     | 158.5       | 16.67                                                      | 83.33                                                 |
| I/10        | SW        | Del/Del     | Null           | 23       | 25.4                     | 172.0       | 26.32                                                      | 39.47                                                 |
| I/13        | SW        | Del/sc      | Null           | 20       | 23.9                     | 173.5       | 15.79                                                      | 65.79                                                 |
| I/6         | SW        | Del/Del     | Null           | 19       | 18.6                     | 178.0       | 14.71                                                      | 58.83                                                 |
| I/16        | SW        | Conv/Conv   | Null           | 19       | 32.9                     | 177.0       | 27.27                                                      | 56.82                                                 |
| I/4         | SW        | Del/I2G     | A              | 31       | 27.6                     | 184.0       | 15.91                                                      | 45.45                                                 |
| I/3         | SW        | I2G/I2G     | A              | 24       | 21.9                     | 167.0       | 23.53                                                      | 44.12                                                 |
| I/11        | SW        | Y97X/I2G    | A              | 22       | 19.6                     | 180.0       | 18.06                                                      | 41.67                                                 |
| I/22        | SW        | Conv/I2G    | A              | 22       | 28.7                     | 170.0       | 18.42                                                      | 26.32                                                 |
| I/14        | SW        | Conv/I172N  | B              | 41       | 27.3                     | 167.0       | 15.79                                                      | 26.32                                                 |
| I/20        | SW        | Del/I172N   | B              | 40       | 27.3                     | 174.0       | 20.00                                                      | 50.00                                                 |
| I/18        | SW        | I2G/I172N   | B              | 29       | 23.7                     | 178.0       | 10.53                                                      | 26.32                                                 |
| I/8         | SV        | Del/I2G     | A              | 44       | 27.3                     | 164.0       | 19.44                                                      |                                                       |
| I/15        | SV        | R356W/I172N | B              | 39       | 30.1                     | 163.0       | 15.79                                                      |                                                       |
| I/7         | SV        | I2G/I172N   | B              | 37       | 21.3                     | 176.0       | 16.67                                                      |                                                       |
| I/2         | SV        | Del/I172N   | B              | 22       | 29.3                     | 170.0       | 20.00                                                      |                                                       |
| I/12        | SV        | Del/P30L    | C              | 36       | 25.9                     | 174.0       | 10.53                                                      |                                                       |
| I/21        | SV        | Del/P30L    | C              | 27       | 29.6                     | 173.0       | 15.00                                                      |                                                       |
| I/5         | SV        |             |                | 32       | 28.9                     | 170.0       | 10.00                                                      |                                                       |

Phenotype, genotype, mutation group (19), age, body mass index (BMI), height, glucocorticoid (GC) dosage, and fludrocortisone (FC) dosage were collected at the time of investigation in 22 adult male patients with CAH. Patient no. I/5 had been diagnosed outside of our center with no molecular study being performed yet. Glucocorticoid dose equivalent was calculated with: hydrocortisone, 1; prednisolone/prednisone, 4; and dexamethasone, 70 (20). SV, Classical simple virilizing; SW, classical salt wasting.

available assays. The GnRH stimulation test was performed by administering 100  $\mu$ g GnRH (Aventis Pharma GmbH, Frankfurt, Germany) as an iv bolus. Serum FSH and LH levels were measured at 0 and 30 min after GnRH dose. An increase of 2-fold was considered normal.

### Statistical analysis

For correlation analysis, Spearman's correlation coefficient was used. Means were compared using a *t* test. For group comparisons, statistical analyses were performed with the nonparametric Mann-Whitney *U* test. Two-sided *P* values are reported, and a *P* value less than 0.05 was regarded as significant. Statistical analysis was performed using SPSS for Windows 15.0 (SPSS, Inc., Chicago, IL).

## Results

### Hormonal control

Poor therapy control with elevated  $\Delta^4$ -androstenedione in serum and 17-OHP in serum/saliva and/or pregnanetriol in urine was present in five patients. Eight patients presented with well-controlled CAH, and nine of 22 had low to suppressed serum  $\Delta^4$ -androstenedione and low 17-OHP levels (serum/saliva) and/or pregnanetriol in urine, indicating possible overtreatment (for details see Table 1; data for salivary 17-OHP day profiles and pregnanetriol in urine not shown).

### Leydig cell function (testosterone and LH levels)

In eight patients (36%), serum testosterone levels were below normal [median 416 ng/dl (14.4 nmol/liter)]. Basal LH levels were decreased in three patients. GnRH stimulation induced an adequate increase in all but one patient. All three patients with suppressed basal LH levels had elevated serum  $\Delta^4$ -androstenedione levels, two of them with elevated estradiol. Three other patients with elevated  $\Delta^4$ -androstenedione levels had normal LH levels, however, in the lower normal range. There was no correlation of serum testosterone, or estradiol and basal or stimulated LH levels;  $\Delta^4$ -androstenedione was negatively correlated with stimulated LH levels (*P* = 0.011).

### Semen analysis

Semen analysis was performed in 19 patients (Table 2).

### Semen analysis, FSH, and inhibin B levels

In 15 of 22, serum FSH levels were within the reference range, in four of 22 elevated, and in three of 22 decreased. All patients with elevated basal serum FSH levels had a normal FSH response with GnRH stimulation. In two patients with low basal FSH levels, stimulated FSH responses were insufficient. All three patients with FSH levels below the normal range also had suppressed basal LH levels. Six patients with normal basal FSH levels showed inadequately stimulated FSH levels. FSH levels were negatively correlated with all semen parameters except motility (total sperm count *r* =  $-0.56$ , *P* = 0.012; sperm concentration *r* =  $-0.57$ , *P* = 0.011; sperm morphology *r* =  $-0.53$ , *P* = 0.019). FSH levels were correlated negatively with inhibin B levels (*r* =  $-0.65$ ; *P* = 0.001). Serum inhibin B levels were 99.3 pg/ml (median; range 24.2–301.1 pg/ml). Three patients had inhibin B levels below the reference range; all three had oligoas-

thenoteratozoospermia. Serum inhibin B levels showed a strong positive correlation with all semen parameters (total sperm count *r* = 0.74, *P* < 0.0001; sperm concentration *r* = 0.75, *P* < 0.0001; sperm morphology *r* = 0.60, *P* = 0.008; motile sperm *r* = 0.48, *P* = 0.038).

### TARTs

Of 22 TARTs, 10 were detected by ultrasound, and all were bilaterally. In 18 of 22 patients, MRI was performed that confirmed the ultrasound findings in all cases (Table 2).

### Relationship of TARTs, hormonal control parameters, and phenotype

Neither TART presence nor volume showed a significant correlation with any marker of hormonal control. TART volume was significantly higher in salt-wasting patients compared with simple virilizing patients (*P* = 0.037).

### Relationship of TARTs, inhibin B, and sperm parameters

In patients with and without TARTs, inhibin B levels differed significantly (*P* = 0.03), and there were higher total sperm counts and concentrations in patients without TARTs (*P* = 0.027, *P* = 0.021).

Tumor volume negatively correlated with sperm concentration (*r* =  $-0.70$ ; *P* = 0.036), sperm morphology (*r* =  $-0.70$ ; *P* = 0.038), functional testicular volume (total testis volume minus tumor volume), sperm concentration (*r* = 0.70; *P* = 0.002), and total sperm count (*r* = 0.69; *P* = 0.002).

## Discussion

### Semen quality of CAH patients

Our data show a surprisingly high prevalence of impaired spermatogenesis in adult male CAH patients. Conventional techniques for spermiogram evaluation have been standardized by the WHO (7). Nevertheless, there is no general agreement which parameter is best in predicting fertility (9). In a prospective study on first pregnancy planners, Bonde *et al.* (10) suggested that the lower limit of a normal sperm concentration is close to 40 million/ml. Applying this reference only 42% of our patients were above this limit. A European study of fertile men indicated a longer waiting time to pregnancy, with sperm concentration less than 55 million/ml and morphologically normal spermatozoa less than 19% (11). Only three (16%) of our CAH patients had semen parameters above this threshold. Although semen quality in the general German population is declining, the median sperm concentration in this population is still 44 million/ml (12), whereas it ranged at 31 million/ml in our CAH cohort. This provides indirect evidence that even for the least affected men, the time to pregnancy is likely to be prolonged, although *in vivo* fertility of our patients cannot be predicted with certainty. Four of our patients have fathered children at a time point when no information on semen parameters or TARTs were available. However, one (patient no. I/15) additionally fathered a child during the study period (natural conception). Interestingly, his

**TABLE 2.** Endocrine parameters of the patient cohort

|                      | Hormone profile       |                      |                        |                       |                      |                            |                         |                            |
|----------------------|-----------------------|----------------------|------------------------|-----------------------|----------------------|----------------------------|-------------------------|----------------------------|
|                      | LH basal<br>(U/liter) | LH peak<br>(U/liter) | FSH basal<br>(U/liter) | FSH peak<br>(U/liter) | Inhibin B<br>(pg/ml) | Androstenedione<br>(ng/ml) | Testosterone<br>(ng/dl) | 17-OHP in<br>serum (ng/ml) |
| Patient no.          |                       |                      |                        |                       |                      |                            |                         |                            |
| I/9                  | 8.2                   | 56.2                 | 18.0                   | 35.9                  | 26.9                 | 0.6                        | 431                     | 1.8                        |
| I/1                  | 4.2                   | 48.7                 | 13.3                   | 33.7                  | 24.2                 | 0.6                        | 552                     | 1.5                        |
| I/17                 | 2.5                   |                      | 7.1                    |                       | 41.6                 | 1.3                        | 328                     | 9.2                        |
| I/19                 | 4.9                   | 23.1                 | 5.9                    | 9.1                   | 133.5                | 2.2                        | 478                     | 0.3                        |
| I/10                 | 0.1                   | 1.0                  | 0.3                    | 0.5                   | 76.9                 | 7.4                        | 566                     | 103.5                      |
| I/13                 | 2.1                   | 25.8                 | 3.3                    | 6.7                   | 136.5                | 0.6                        | 448                     | 1.7                        |
| I/6                  | 0.7                   | 3.6                  | 0.7                    | 0.7                   | 179.1                | 25.1                       |                         | 90.0                       |
| I/16                 | 2.0                   | 38.9                 | 7.5                    | 18.3                  | 77.2                 | 0.6                        | 279                     | 2.2                        |
| I/4                  | 1.4                   | 15.9                 | 1.5                    | 3.1                   | 99.3                 | 6.0                        | 359                     | 56.0                       |
| I/3                  | 3.4                   | 28.5                 | 2.4                    | 5.5                   | 150.5                | 1.3                        | 711                     | 2.2                        |
| I/11                 | 3.0                   | 30.6                 | 12.0                   | 23.5                  | 97.6                 | 0.7                        | 464                     | 0.9                        |
| I/22                 | 1.9                   | 31.5                 | 3.9                    | 9.3                   | 135.2                | 0.6                        | 416                     | 2.6                        |
| I/14                 | 2.9                   | 16.0                 | 2.7                    | 4.5                   | 172.4                | 0.4                        | 229                     | 1.1                        |
| I/20                 | 3.7                   | 29.7                 | 9.0                    | 14.4                  | 83.2                 | 0.9                        | 328                     | 1.7                        |
| I/18                 | 3.7                   | 30.2                 | 4.7                    | 10.6                  | 147.7                | 8.6                        | 454                     | 0.1                        |
| I/8                  | 11.3                  | 67.8                 | 20.6                   | 44.1                  | <10.0                | 2.6                        | 141                     | 18.0                       |
| I/15                 | 2.7                   | 20.2                 | 2.4                    | 3.4                   | 301.1                | 0.9                        | 255                     | 2.9                        |
| I/7                  | 3.1                   | 31.9                 | 6.8                    | 15.1                  | 52.2                 | 0.4                        | 366                     | 0.2                        |
| I/2                  | 5.8                   | 32.9                 | 7.7                    | 13.3                  | 90.9                 | 1.0                        | 490                     | 3.6                        |
| I/32                 | 2.3                   | 24.3                 | 6.2                    | 12.9                  | 81.9                 | 2.7                        | 501                     | 62.0                       |
| I/21                 | 0.8                   | 16.6                 | 0.7                    | 2.8                   | 136.8                | 5.8                        | 238                     | 38.9                       |
| I/5                  | 2.0                   | 139                  | 30                     | 3.7                   | 205.0                | 7.2                        | 239                     | 16.8                       |
| Median SW (range)    | 2.7 (0.1–8.2)         | 29.1 (1.0–56.2)      | 4.7 (0.3–18.0)         | 9.2 (0.5–35.9)        | 99.3 (24.2–179.1)    | 0.9 (0.4–25.1)             | 439.5 (229.0–711.0)     | 1.8 (0.1–103.5)            |
| Median SV (range)    | 2.7 (0.8–11.3)        | 24.3 (13.9–67.8)     | 6.2 (0.7–20.6)         | 12.9 (2.8–44.1)       | 113.9 (52.2–301.1)   | 2.6 (0.4–7.2)              | 225.0 (141.0–501.0)     | 16.8 (0.2–62.0)            |
| Median total (range) | 2.8 (0.1–11.3)        | 28.5 (1.0–67.8)      | 5.3 (0.3–20.6)         | 9.3 (0.5–44.1)        | 99.3 (24.2–301.1)    | 1.15 (0.4–25.1)            | 416.0 (141.9–711.0)     | 2.4 (0.1–103.5)            |
| Normal values        | 1.0–10.0              | >2-fold              | 1.0–10.0               | >2-fold               | >40.0                | 1.2–4.8                    | 350–900                 | 0.1–1.6                    |

Basal and stimulated serum levels of LH and FSH, baseline serum levels of inhibin B, androstenedione, testosterone, and 17-OHP were determined at the time of investigation. Testicular volumes, TART volumes, and functional testis volumes measured by MRI (18 of 22) and results of semen analysis (19 of 22). Conversion factors: androstenedione  $\times$  3.49 nmol/liter; testosterone  $\times$  0.0347 nmol/liter; and 17-OHP  $\times$  3.026 nmol/liter.

<sup>a</sup> TART volume was significantly higher in salt-wasting patients compared with simple virilizing patients ( $P = 0.037$ ).

<sup>b</sup> Total sperm count, sperm concentration, motile sperm, and viability were assessed according to WHO criteria of 1999 (7).

<sup>c</sup> Morphology was performed according to Tygerberg's criteria (8).

semen analysis revealed a sperm concentration in the upper range of 177.8 million/ml with no TARTs being present.

### Leydig cell dysfunction

Decreased testosterone levels [median 416 ng/dl (14.4 nmol/liter)] compared with the general German population [median 640 ng/dl (22.2 nmol/liter)] (12) and reduced semen volume also indicate impaired Leydig cell function in our CAH cohort. These findings could be explained either by disease or treatment-related effects on the hypothalamus-pituitary axis or through direct, intratesticular mechanisms. In the first instance, inadequately controlled adrenal androgen production and its conversion to estrogens can suppress gonadotropin secretion. Such an effect is likely to contribute to the Leydig cell impairment in five of 19 of our patients who presented with high  $\Delta^4$ -androstenedione serum levels, whereas LH levels were in the lower normal range ( $n = 1$ ) or below normal ( $n = 4$ ), and testosterone was either in the lower normal range ( $n = 4$ ) or below ( $n = 1$ ). Furthermore, low basal LH levels could also be explained by LH suppression through estradiol, which was elevated in four of our patients. On the other hand, five of 19 patients were characterized by normal LH serum levels with concomitant low-serum testosterone and normal estradiol and normal  $\Delta^4$ -androstenedione levels. Two of these patients had TARTs, suggesting a local effect on Leydig cell function either mechanically or by local steroid production, hereby confirming the data published by Stikkelbroeck *et al.* (1). The fact that all except one patient had normal GnRH stimula-

tion tests suggests that hypothalamus-pituitary gonadal (HPG) dysfunction can be overcome via stimulation and, thus, should be reversible.

### Influencing factors of spermatogenesis

Although we and others (1, 13) could not demonstrate a correlation of hormonal control and semen parameters or TART prevalence or size, this does not exclude its potential causal relationship. It has been shown that TARTs are ACTH dependent, and a decrease in TART size can be achieved through dexamethasone therapy (6). Thus, because TARTs might have developed over a longer period of time, they could be regarded as a more sensitive indicator of the long-term endocrine control than single hormonal measurements in a cross-sectional study design. The same holds true for the relationship of semen parameters and hormonal control, which is further complicated by the fact that sperm production takes 70–80 d, whereas endocrine control parameters reflect the current hormonal situation when the patients were examined.

In fact, several men in the study had low LH, FSH, and testosterone levels, and inadequately stimulated FSH in the GnRH test, which might reflect glucocorticoid-induced suppression of the HPG axis due to overtreatment. This interpretation could explain some of the seminal fluid abnormalities. One may argue that glucocorticoid overdosage is contradicted by the simultaneous finding of TARTs, which rather would suggest inadequate ACTH suppression. Although it is intriguing to speculate that

TABLE 2. Continued

| Testicular morphology        |                             |                                   |                                     | Semen parameters                         |                  |                       |                  |
|------------------------------|-----------------------------|-----------------------------------|-------------------------------------|------------------------------------------|------------------|-----------------------|------------------|
| Total testicular volume (ml) | Total TART volume (ml)      | Functional testicular volume (ml) | Total sperm count ( $\times 10^6$ ) | Sperm concentration ( $\times 10^6$ /ml) | Motile sperm (%) | Normal morphology (%) | Viability (%)    |
| 26.13                        | 9.74                        | 16.39                             | 7.8                                 | 11.2                                     | 50               | 6.0                   | 62               |
| 29.10                        | 5.58                        | 23.52                             | 57.9                                | 18.7                                     | 50               | 4.0                   | 72               |
| 17.04                        | 3.53                        | 13.51                             | 0.8                                 | 0.3                                      | 0                | 0                     | 0                |
| 24.40                        | 2.19                        | 22.21                             | 97.4                                | 40.6                                     | 50               | 9.0                   | 79               |
| 48.12                        | 21.56                       | 26.56                             | 0                                   | 0                                        | 0                | 0                     | 0                |
|                              |                             |                                   | 487.5                               | 195.0                                    | 55               | 7.0                   | 72               |
| 21.95                        | 4.88                        | 17.07                             |                                     |                                          |                  |                       |                  |
| 35.29                        | 1.25                        | 34.04                             | 463.1                               | 165.4                                    | 55               | 28.0                  | 82               |
|                              |                             |                                   | 227.2                               | 59.8                                     | 50               | 30.0                  | 64               |
| 29.38                        | 0                           | 29.38                             | 48.7                                | 20.3                                     | 40               | 4.0                   | 54               |
| 35.25                        | 0                           | 35.25                             | 131.0                               | 62.4                                     | 60               | 7.0                   | 70               |
| 28.17                        | 0                           | 28.17                             | 92.0                                | 92.0                                     | 50               | 7.0                   | 71               |
| 21.10                        | 2.90                        | 18.20                             | 19.5                                | 7.8                                      | 50               | 8.0                   | 72               |
| 14.93                        | 3.07                        | 11.86                             | 0.9                                 | 0.9                                      | 0                | 0                     | 0                |
| 33.01                        | 0                           | 33.01                             | 497.8                               | 177.8                                    | 60               | 19.0                  | 78               |
| 21.19                        | 0.37                        | 20.82                             | 48.3                                | 19.3                                     | 50               | 7.0                   | 64               |
| 21.52                        | 0                           | 21.52                             | 33.6                                | 14.0                                     | 30               | 9.0                   | 52               |
| 25.36                        | 0                           | 25.36                             | 114.8                               | 32.8                                     | 60               | 10.0                  | 66               |
| 26.02                        | 0                           | 26.02                             | 262.1                               | 187.2                                    | 50               | 21.0                  | 70               |
| 21.76                        | 0                           | 21.76                             | 127.9                               | 31.2                                     | 50               | 9.0                   | 80               |
| 28.2 (17.0–48.1)             | 4.2 (1.3–21.6) <sup>a</sup> | 23.5 (13.5–35.3)                  | 75.0 (0.0–487.5)                    | 30.5 (0.0–195.0)                         | 50 (0–60)        | 7.0 (0.0–30.0)        | 70.5 (0–82)      |
| 21.8 (14.9–33.0)             | 1.7 (0.4–3.1) <sup>a</sup>  | 21.8 (11.9–33.0)                  | 114.8 (0.9–497.8)                   | 31.2 (0.9–187.2)                         | 50 (0–60)        | 9.0 (0.0–21.0)        | 66 (0–80)        |
| 25.4 (14.9–48.1)             | 3.3 (0.4–21.6)              | 22.9 (11.9–35.3)                  | 92.0 (0.0–497.8)                    | 31.2 (0.0–195.0)                         | 50 (0–60)        | 7.0 (0.0–30.0)        | 70 (0–82)        |
|                              |                             |                                   | >40 <sup>b</sup>                    | >20 <sup>b</sup>                         | >50 <sup>b</sup> | >14 <sup>c</sup>      | >75 <sup>b</sup> |

these findings might reflect differences in responsiveness of the HPG axis and testicular adrenal rest tissue to glucocorticoid treatment, overall, only longitudinal investigation with close follow-up of individual patients could provide indirect evidence for a causal relationship.

A major supposed cause of subfertility through TARTs is the mechanical obstruction of the seminiferous tubules by the tumor (14). Mechanical obstruction by TARTs would explain the negative correlation of TART volume with semen parameters, and the absence of a correlation between TART volume and any hormone levels, including inhibin B. Inhibin B, a reliable marker of Sertoli cell function (15), in our patients was highly correlated with sperm concentration, as well as functional testicular volume and tumor volume. Inhibin B levels have correlated positively with Sertoli cell number (16) and negatively with seminiferous tubules damage (17). This supports both the hypothesis of testis parenchyma damage leading to a reduced number of Sertoli cells and mechanical obstruction of seminiferous tubules via TARTs, as well as impaired testis development and, thus, Sertoli cell development in CAH patients independent from TART presence. This is in line with the Chilean finding (18) of lower inhibin levels in CAH already in prepubertal boys also in the absence of TARTs.

In conclusion, we hypothesize that the most important determinant factors of impaired fecundity in male CAH patients are the development of TARTs on the one hand and gonadal axis suppression on the other. Most likely, both mechanisms repre-

sent complex long-term consequences of insufficient hormonal control that are not reflected adequately by routine hormonal pituitary-gonadal axis parameters. Inhibin B serum levels correlate with Sertoli cell function, and seem to be an adequate diagnostic tool that could be of benefit to monitor and improve fertility outcome in CAH patients.

## Acknowledgments

Address all correspondence and requests for reprints to: Nicole Reisch, M.D., Medizinische Klinik-Innenstadt, Klinikum der Universität München, Ziemssenstr. 1, D-80336 München, Germany. E-mail: nicole.reisch@med.uni-muenchen.de.

Disclosure Summary: The authors have nothing to disclose.

## References

- Stikkelbroeck NM, Otten BJ, Pasic A, Jager GJ, Sweep CG, Noordam K, Hermus AR 2001 High prevalence of testicular adrenal rest tumors, impaired spermatogenesis, and Leydig cell failure in adolescent and adult males with congenital adrenal hyperplasia. *J Clin Endocrinol Metab* 86:5721–5728
- Barwick TD, Malhotra A, Webb JA, Savage MO, Reznick RH 2005 Embryology of the adrenal glands and its relevance to diagnostic imaging. *Clin Radiol* 60:953–959
- Hamwi GJ, Gwinup G, Mostow JH, Besch PK 1963 Activation of testicular adrenal rest tissue by prolonged excessive ACTH production. *J Clin Endocrinol Metab* 23:861–869
- Bercovici JP, Fiet J, Gibault L, Volant A, Abalain JH, Floch HH, Sonnet E,



- Fournier G 2005 Testicular adrenal rest tumours in salt wasting congenital adrenal hyperplasia (in vivo and in vitro studies). *J Steroid Biochem Mol Biol* 93:67–72
5. Claahsen-van der Grinten HL, Otten BJ, Sweep FC, Span PN, Ross HA, Meuleman EJ, Hermus AR 2007 Testicular tumors in patients with congenital adrenal hyperplasia due to 21-hydroxylase deficiency show functional features of adrenocortical tissue. *J Clin Endocrinol Metab* 92:3674–3680
  6. Claahsen-van der Grinten HL, Otten BJ, Sweep FC, Hermus AR 2007 Repeated successful induction of fertility after replacing hydrocortisone with dexamethasone in a patient with congenital adrenal hyperplasia and testicular adrenal rest tumors. *Fertil Steril* 88:705.e5–e8
  7. Bals-Pratsch M, Behre HM, Knuth UA 1999 World Health Organization (WHO)-Laborhandbuch. zur Untersuchung des menschlichen Ejakulates und der Spermen-Zervikalschleim-Interaktion. Berlin: Springer-Verlag
  8. Menkveld R, Stander FS, Kotze TJ, Kruger TF, van Zyl JA 1990 The evaluation of morphological characteristics of human spermatozoa according to stricter criteria. *Hum Reprod* 5:586–592
  9. Guzick DS, Overstreet JW, Factor-Litvak P, Brazil CK, Nakajima ST, Coutifaris C, Carson SA, Cisneros P, Steinkampf MP, Hill JA, Xu D, Vogel DL 2001 Sperm morphology, motility, and concentration in fertile and infertile men. *N Engl J Med* 345:1388–1393
  10. Bonde JP, Ernst E, Jensen TK, Hjøllund NH, Kolstad H, Henriksen TB, Scheike T, Giwercman A, Olsen J, Skakkebaek NE 1998 Relation between semen quality and fertility: a population-based study of 430 first-pregnancy planners. *Lancet* 352:1172–1177
  11. Slama R, Eustache F, Ducot B, Jensen TK, Jorgensen N, Horte A, Irvine S, Suominen J, Andersen AG, Auger J, Vierula M, Toppari J, Andersen AN, Keiding N, Skakkebaek NE, Spira A, Jouannet P 2002 Time to pregnancy and semen parameters: a cross-sectional study among fertile couples from four European cities. *Hum Reprod* 17:503–515
  12. Paasch U, Salzbrunn A, Glander HJ, Plambeck K, Salzbrunn H, Grunewald S, Stucke J, Skakkebaek NE, Jorgensen N 2008 Semen quality in sub-fertile range for a significant proportion of young men from the general German population: a co-ordinated, controlled study of 791 men from Hamburg and Leipzig. *Int J Androl* 31:93–102
  13. Cabrera MS, Vogiatzi MG, New MI 2001 Long term outcome in adult males with classic congenital adrenal hyperplasia. *J Clin Endocrinol Metab* 86:3070–3078
  14. Claahsen-van der Grinten HL, Otten BJ, Hermus AR, Sweep FC, Hulsbergen-van de Kaa CA 2008 Testicular adrenal rest tumors in patients with congenital adrenal hyperplasia can cause severe testicular damage. *Fertil Steril* 89:597–601
  15. Andersson AM, Petersen JH, Jorgensen N, Jensen TK, Skakkebaek NE 2004 Serum inhibin B and follicle-stimulating hormone levels as tools in the evaluation of infertile men: significance of adequate reference values from proven fertile men. *J Clin Endocrinol Metab* 89:2873–2879
  16. Ramaswamy S, Marshall GR, McNeilly AS, Plant TM 1999 Evidence that in a physiological setting Sertoli cell number is the major determinant of circulating concentrations of inhibin B in the adult male rhesus monkey (*Macaca mulatta*). *J Androl* 20:430–434
  17. Suescun MO, Lustig L, Calandra RS, Groome NP, Campo S 2001 Correlation between inhibin secretion and damage of seminiferous tubules in a model of experimental autoimmune orchitis. *J Endocrinol* 170:113–120
  18. Martinez-Aguayo A, Rocha A, Rojas N, García C, Parra R, Lagos M, Valdivia L, Poggi H, Cattani A, Chilean Collaborative Testicular Adrenal Rest Tumor Study Group 2007 Testicular adrenal rest tumors and Leydig and Sertoli cell function in boys with classical congenital adrenal hyperplasia. *J Clin Endocrinol Metab* 92:4583–4589
  19. Krone N, Braun A, Roscher AA, Knorr D, Schwarz HP 2000 Predicting phenotype in steroid 21-hydroxylase deficiency? Comprehensive genotyping in 155 unrelated, well defined patients from southern Germany. *J Clin Endocrinol Metab* 85:1059–1065
  20. Rivkees SA, Crawford JD 2000 Dexamethasone treatment of virilizing congenital adrenal hyperplasia: the ability to achieve normal growth. *Pediatrics* 106:767–773
